# Supplementary material
Source: Springer Nature journal article supplement (https://www.springermedizin.de/resource/supplementary/12943_2010_756_MOESM7_ESM.pdf/9554758)

## A) Ad/AH-EBV

## B) Ad/AH-EBERs

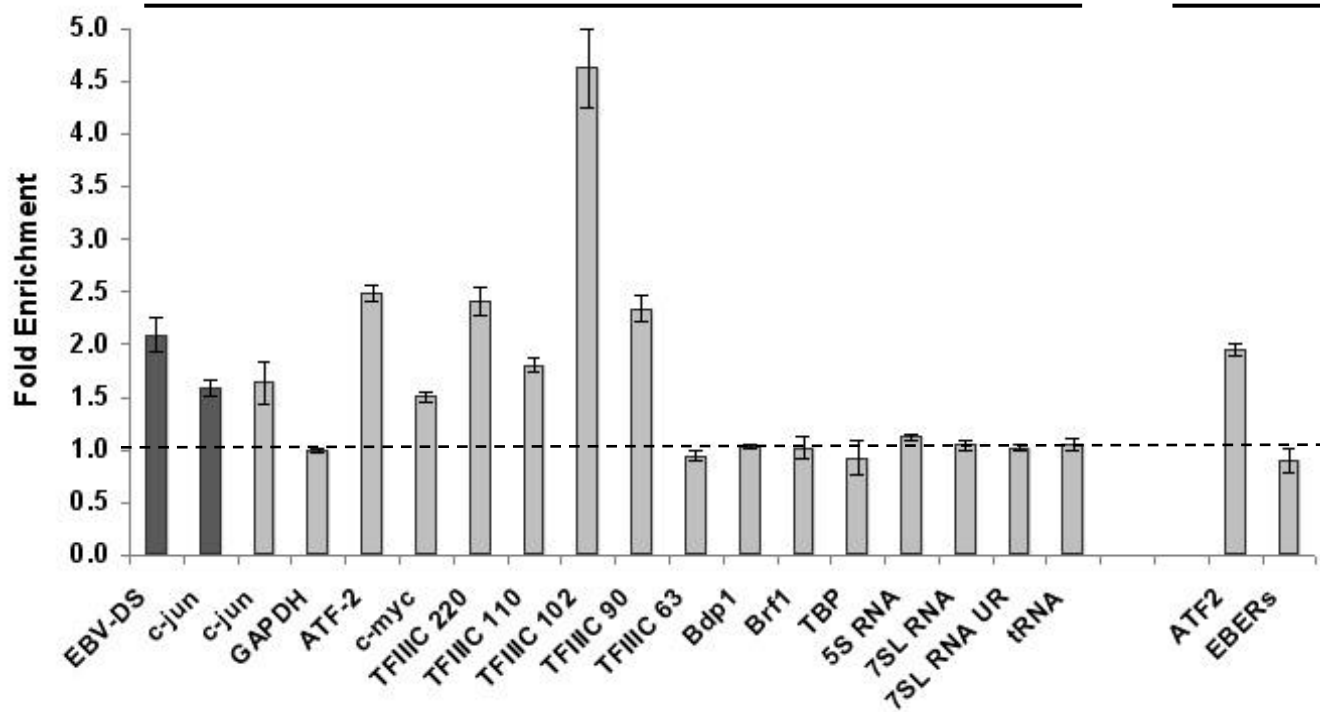

Supplement: MOESM7 [file 9554758]
